# Supplementary material
Source: PubMed Central journal article supplement (PMC2614774)
Supplement: 0810274105_0810274105SI.pdf [file 0810274105_0810274105SI.pdf]

# Supporting Information

Kedzierska *et al.* 10.1073/pnas.0810274105

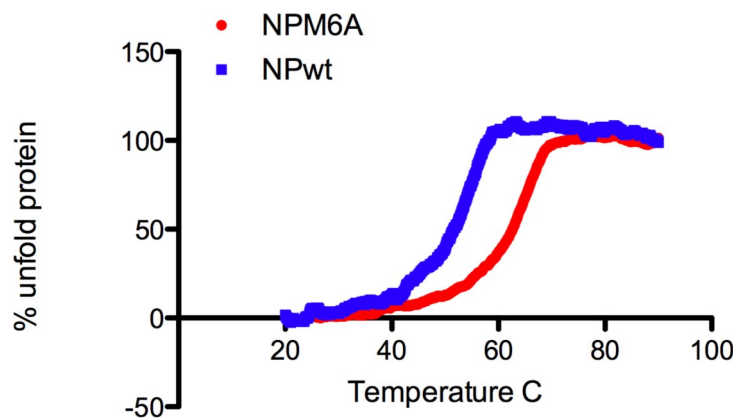

|                        |                              |
|------------------------|------------------------------|
| H2Db-NP                | $51.8 \pm 0.7^\circ\text{C}$ |
| H2Db-NP <sup>M6A</sup> | $63.3 \pm 0.7^\circ\text{C}$ |

**Fig. S1.** Thermostability of the H2D<sup>b</sup>-NP<sub>366</sub> and H2D<sup>b</sup>-NPM6A complexes. Thermostability measurements of recombinant class I complexes were performed using circular dichroism. The measurements for the thermal melting experiments were made at 218 and 220 nm for H2D<sup>b</sup>-NP<sub>366</sub> and H2Db-NP<sup>M6A</sup>, respectively, at intervals of 0.1 °C at a rate of 1 °C/min from 20 °C to 90 °C. The midpoint of thermal denaturation ( $T_m$ ) for each protein was determined at the point at which 50% unfolding was achieved. The peptide–MHC complex with NP<sub>366</sub> WT epitope had a  $T_m$  of  $51.8 \pm 0.7^\circ\text{C}$ , irrespective of the concentration of the complex used for the thermostability assay. The H2D<sup>b</sup> bound with the variant NPM6A epitope shows a higher thermostability with a  $T_m$  of  $63.3 \pm 0.7^\circ\text{C}$ , irrespective of the concentration of the complex used for the thermostability assay.



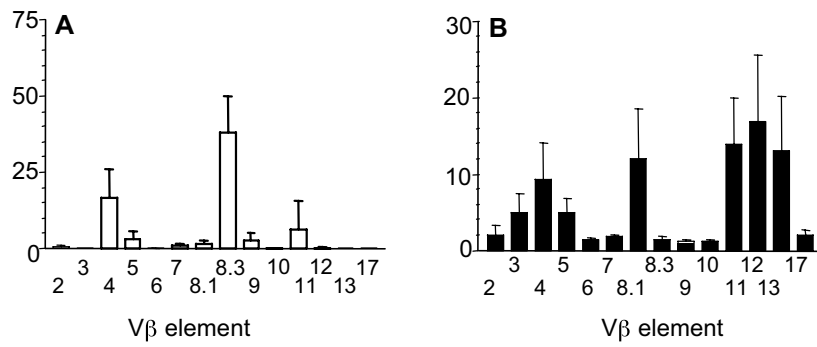

**Fig. S3.** TCRV $\beta$  usage in D<sup>b</sup>NPM6A<sup>+</sup> CD8<sup>+</sup> T cell responses. WT D<sup>b</sup>NP<sub>366</sub> (A) or mutant NPM6A (B) CD8<sup>+</sup> T cell responses were generated by infection with the WT HK (A) or HK-NPM6A (B) viruses. Splenocytes were stained with the D<sup>b</sup>NP<sub>366</sub> (A) or D<sup>b</sup>NPM6A (B) tetramers; anti-CD8 and anti-V $\beta$  mAbs were conjugated with FITC, then the tetramer<sup>+</sup>CD8<sup>+</sup> cells were analyzed for profiles of V $\beta$  staining. Shown are mean  $\pm$  SD values for groups of 4–5 secondarily-infected mice.

**Table S1. TCR repertoire diversity of M6A<sup>+</sup>CD8<sup>+</sup> T cells during primary (i.p.) and secondary (i.p.→ i.n.) influenza-specific responses**

| Statistic                                       | Primary M6A <sup>+</sup> CD8 <sup>+</sup> | Secondary M6A <sup>+</sup> CD8 <sup>+</sup> |
|-------------------------------------------------|-------------------------------------------|---------------------------------------------|
| Mice analyzed                                   | 4                                         | 6                                           |
| TCRs sequenced                                  | 466                                       | 530                                         |
| Predominant J $\beta$ region                    | 2S1, 2S4                                  | 2S4                                         |
| Predominant CDR3 $\beta$ length, aa             | 8, 9                                      | 8, 9, 10                                    |
| Different sequences                             | 29                                        | 26                                          |
| Repeated sequences                              | 6                                         | 3                                           |
| V $\beta$ per mouse                             | 2.8                                       | 2.2                                         |
| Total sequences per V $\beta$                   | 42.4                                      | 40.2                                        |
| Clonotypes per V $\beta$                        | 3.3                                       | 2.4                                         |
| Clonotypes per mouse                            | 9.0                                       | 5.0                                         |
| Clonotypes with basic amino acid (R, K or H), % | 79.3                                      | 96.2                                        |

Predominant CDR3 $\beta$  and J $\beta$  is defined as > 15%.

**Table S2. Frequency of TCR $\beta$  amino acid sequences in M6A<sup>+</sup>CD8<sup>+</sup> T cell responses**

| CDR3 $\beta$ region               | J $\beta$ | Amino acid | Frequency |    |     |    |    |     |
|-----------------------------------|-----------|------------|-----------|----|-----|----|----|-----|
|                                   |           |            | M1        | M2 | M3  | M4 | M5 | M6  |
| <b>V<math>\beta</math>4</b>       |           |            |           |    |     |    |    |     |
| SQERGRGNTL                        | 153       | 10         |           |    | 55  |    |    |     |
| SQKTVNQAP                         | 155       | 9          | 22        |    |     |    |    |     |
| SQRQGYAEQ                         | 251       | 9          | 12        |    |     |    |    |     |
| <b>V<math>\beta</math>5.1/5.2</b> |           |            |           |    |     |    |    |     |
| SLDRKYEQ*                         | 256       | 8          |           |    |     |    |    | 1   |
| SLDRLYEQ                          | 256       | 8          |           |    |     |    |    | 41  |
| SLELKNTGQL                        | 252       | 10         |           |    |     |    |    | 36  |
| SLGLKNTGQL                        | 252       | 10         |           |    |     |    |    | 1   |
| SPHWGVYAEQ                        | 251       | 10         |           |    |     |    |    | 3   |
| <b>V<math>\beta</math>8.1/8.2</b> |           |            |           |    |     |    |    |     |
| GDGGRDTQ                          | 255       | 8          |           |    |     | 43 |    |     |
| GPGGARSERL                        | 154       | 10         |           |    |     | 2  |    |     |
| RDKNTEV                           | 151       | 7          |           |    | 2   |    |    |     |
| SDAGRQAP                          | 155       | 9          |           |    |     | 5  |    |     |
| SDTGRRGAETL                       | 253       | 11         |           |    | 37  |    |    |     |
| <b>V<math>\beta</math>12</b>      |           |            |           |    |     |    |    |     |
| RLGNYAEQ                          | 251       | 8          | 11        |    |     |    |    |     |
| SLRGGASDY                         | 152       | 9          |           |    | 53  |    |    |     |
| RGGNYAEQ                          | 251       | 8          | 2         |    |     |    |    |     |
| RGGNHAEQ                          | 251       | 8          | 1         |    |     |    |    |     |
| RQGNVYAEQ                         | 251       | 8          |           | 26 |     |    |    |     |
| RQRLGGTYEQ                        | 256       | 10         | 5         |    |     |    |    |     |
| <b>V<math>\beta</math>13</b>      |           |            |           |    |     |    |    |     |
| SFRGRGTEV                         | 151       | 9          |           |    |     | 1  |    |     |
| SFRGRQNTL*                        | 254       | 9          |           | 32 |     | 33 |    | 31  |
| SLRGALAEQ                         | 251       | 9          |           | 4  |     |    |    |     |
| SLRGLNQAP                         | 155       | 9          |           |    |     | 8  |    |     |
| SLRGRQNTL                         | 254       | 9          |           |    |     |    |    | 14  |
| SLWTTNTEV                         | 151       | 9          |           |    |     |    |    |     |
| RNRGRQNTL*                        | 254       | 9          |           | 5  |     |    |    | 5   |
| Total sequences                   |           |            | 53        | 67 | 147 | 92 | 91 | 121 |

M: individual mouse. Numbers of sequences for each clonotypes are shown. Please refer to ref. 1 for D<sup>b</sup>NP<sub>366</sub><sup>+</sup>CD8<sup>+</sup> TCR repertoire data. Secondary TCR repertoires are shown.

\*Clonotypes correspond to repeated sequences.

1. Kedzierska K, Turner SJ, Doherty PC (2004) Conserved T cell receptor usage in primary and recall responses to an immunodominant influenza virus nucleoprotein epitope. *Proc Natl Acad Sci USA* 101:4942–4947.

**Table S3. Data collection and refinement statistics for D<sup>b</sup>NP-M6A**

|                                      |                                               |
|--------------------------------------|-----------------------------------------------|
| Data collection statistics           |                                               |
| Temperature                          | 100 K                                         |
| Space group                          | <i>P1</i>                                     |
| Cell dimensions (a,b,c), Å           | 57.71, 69.69, 72.38, 99.94°, 111.04°, 110.48° |
| Resolution, Å                        | 50–2.50                                       |
| Total no. of observations            | 80,021 (8,859)                                |
| No. of unique observations           | 30,522 (3,335)                                |
| Multiplicity                         | 2.6 (2.6)                                     |
| Data completeness, %                 | 94.9 (93.9)                                   |
| $I/\sigma_1$                         | 13.70 (5.04)                                  |
| $R_{\text{merger}}$ , %*             | 9.4 (27.3)                                    |
| Refinement statistics                |                                               |
| Nonhydrogen atoms                    |                                               |
| Protein                              | 6,385                                         |
| Water                                | 35                                            |
| Resolution, Å                        | 2.50                                          |
| $R_{\text{factor}}$ , % <sup>†</sup> | 22.0                                          |
| $R_{\text{free}}$ , % <sup>†</sup>   | 28.5                                          |
| rmsd from ideality                   |                                               |
| Bond lengths, Å                      | 0.011                                         |
| Bond angles, °                       | 1.416                                         |
| Ramachandran plot, %                 |                                               |
| Most favored region                  | 87.0                                          |
| Allowed region                       | 11.5                                          |
| Generously allowed region            | 1.5                                           |
| $B$ factors, Å <sup>2</sup>          |                                               |
| Average $B$ value                    | 14.6                                          |
| rmsd of bonded $B$                   | 0.7                                           |

Values in parentheses are for the bin of highest resolution (approximate interval = 0.5 Å).

\* $R_{\text{merge}} = \sum |I_{\text{hkl}} - [I_{\text{hkl}}]| / \sum I_{\text{hkl}}$ .

<sup>†</sup> $R_{\text{factor}} = \sum_{\text{hkl}} ||F_o| - |F_c|| / \sum_{\text{hkl}} |F_o|$  for all data except ≈10%, which were used for  $R_{\text{free}}$  calculation.
